# Supplementary material for: Transcriptomic and metabolomic profiling of ionic liquid stimuli unveils enhanced secondary metabolism in Aspergillus nidulans
Source: PubMed Central journal article supplement (PMC4830055; doi:10.1186/s12864-016-2577-6), 2016-04-12
Supplement: 12864_2016_2577_MOESM1_ESM.pdf [file 12864_2016_2577_MOESM1_ESM.pdf]

## Additional file 1

### Transcriptomic and metabolomic profiling of ionic liquid stimuli unveils enhanced secondary metabolism in *Aspergillus nidulans*

Paula C. Alves<sup>a,#</sup>, Diego O. Hartmann<sup>a,#</sup>, Oscar Núñez<sup>b,c</sup>, Isabel Martins<sup>a</sup>, Teresa L. Gomes<sup>d</sup>, Helga Garcia<sup>a</sup>, Maria Teresa Galceran<sup>b</sup>, Richard Hampson<sup>d</sup>, Jörg D. Becker<sup>e</sup> and Cristina Silva Pereira<sup>a\*</sup>

<sup>a</sup> Instituto de Tecnologia Química e Biológica António Xavier, Universidade Nova de Lisboa, Av. da República, 2780-157 Oeiras, Portugal

<sup>b</sup> Department of Analytical Chemistry, University of Barcelona, Diagonal 645, E-08028 Barcelona, Spain

<sup>c</sup> Serra Hunter Fellow, Generalitat de Catalunya, Spain

<sup>d</sup> Thelial Technologies S.A., Parque Tecnológico de Cantanhede, Nucleo 04 Lote 3, 3060-197 Cantanhede, Portugal

<sup>e</sup> Instituto Gulbenkian de Ciência, Rua da Quinta Grande 6, 2780-156, Oeiras, Portugal

<sup>#</sup> Equally contributing authors

\* Corresponding author:

Cristina Silva Pereira

Instituto de Tecnologia Química e Biológica, Universidade Nova de Lisboa, Av. da República, EAN, 2781-901, Oeiras Portugal

Tel.+351 211157786

E-mail: [spereira@itqb.unl.pt](mailto:spereira@itqb.unl.pt)

## **Contents: Microarray additional details, experimental data and validation**

|                                                                                                                                                |          |
|------------------------------------------------------------------------------------------------------------------------------------------------|----------|
| <b>1. Details on the mapping strategy .....</b>                                                                                                | <b>3</b> |
| <b>1.1. Custom FungiANC microarray design</b>                                                                                                  |          |
| <b>1.2. Custom FungiANC microarray re-annotation</b>                                                                                           |          |
| <b>2. Overview of the microarray data .....</b>                                                                                                | <b>4</b> |
| <b>3. List of the designed qRT-PCR oligonucleotides used in the validation of the microarray data ....</b>                                     | <b>5</b> |
| <b>4. Functional Categories altered in <i>Aspergillus nidulans</i> after exposure to choline and 1-ethyl-3-methylimidazolium chloride.....</b> | <b>6</b> |
| <b>5. Genes of primary metabolism differentially expressed after ionic liquid stimuli.....</b>                                                 | <b>7</b> |

## 1. Details on the mapping strategy

### 1.1. Custom FungiANC microarray design

The nucleotide sequences used for microarray design were from *Aspergillus nidulans* FGSC A4 (v.7, *Aspergillus* Comparative Sequencing Project) and *Neurospora crassa* FGSC 2489 (v.3, *Neurospora crassa* Sequencing Project) genomes retrieved from Broad Institute of Harvard and MIT database (<http://www.broadinstitute.org>, May 2010). The parameters chosen for the custom array design were as follows: 11- $\mu$ m feature size, 49-5241 array format, eukaryotic antisense target type, perfect-match probes only, probe selection within the 600 bp from the 3' end and eight probes *per* sequence as the minimum acceptable. The types of probe sets represented are: 19,839 unique; 77 gene (\_a); 91 identical (\_s) and 58 mixed (\_x). *Aspergillus nidulans* FGSC A4 genes are represented by 10,252 unique probes; 75 gene (\_a); 85 identical (\_s) and 45 mixed (\_x). *Neurospora crassa* FGSC 2489 genes are represented by 9,545 unique probes; 2 gene (\_a); 3 identical (\_s) and 13 mixed (\_x).

Probe gene coverage was calculated as 98 % and 99.8 % for *A. nidulans* and *N. crassa*, respectively.

### 1.2. Custom FungiANC microarray re-annotation

In order to update the annotation of our custom microarray, the transcript sequences were aligned against all chip probe sequences, based on NCBI BLASTN searches (e-value = 10).

Only the alignments with minimal length of 17 bases long were kept and designated as “matching probes”. The existence of at least 6 matching probes to the same transcript was considered the “matching probeset” of that transcript. At last, it was assigned a “Confidence Level” of the mapping according to the total number of mismatch bases considering the total number of probes in the probeset. This way, the levels established were “Certain” ( $\leq 0$ , *i.e.* all perfectly aligned), “Highly Probable” ( $\leq 25$ ), “Probable” ( $\leq 50$ ), “Likely” ( $\leq 75$ ) and “Possible” (other number of mismatch bases).

**2. Overview of the microarray data.** A) Principal Component Analysis. B) Volcano plots: plotting of the statistical significance of the microarray data ( $-\log_{10}$  adjusted  $p$ -value) against the fold-change ( $\log_2$  ratio) for *Aspergillus nidulans* in the different tested media. Significant genes have positive ( $-\log_{10}$ ) adjusted  $p$ -values and they can show different levels of fold-changes. C) Venn diagrams: number of differentially expressed genes in *Aspergillus nidulans* in the different tested media versus the control.

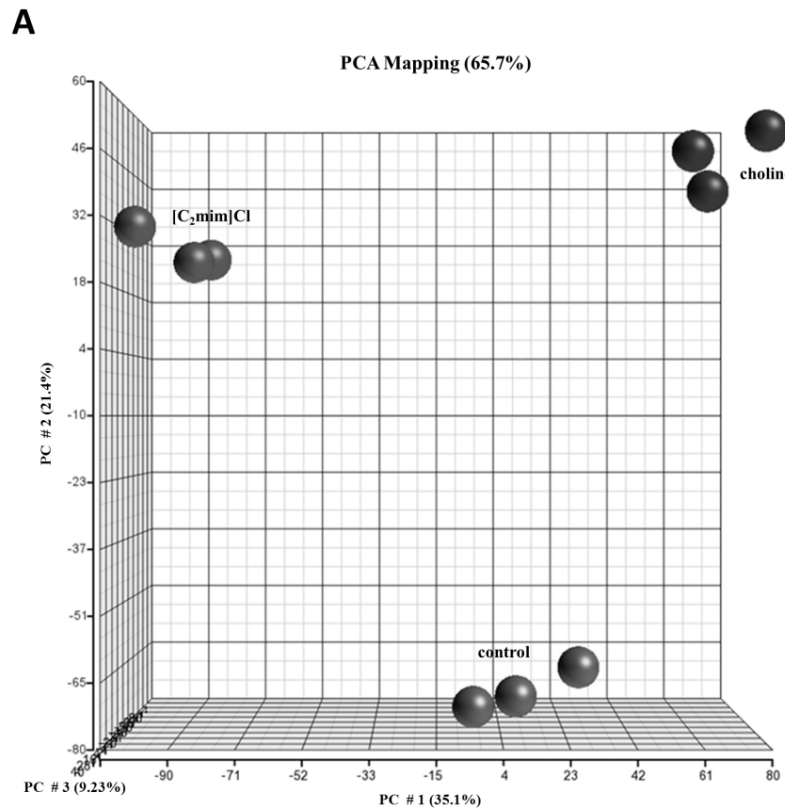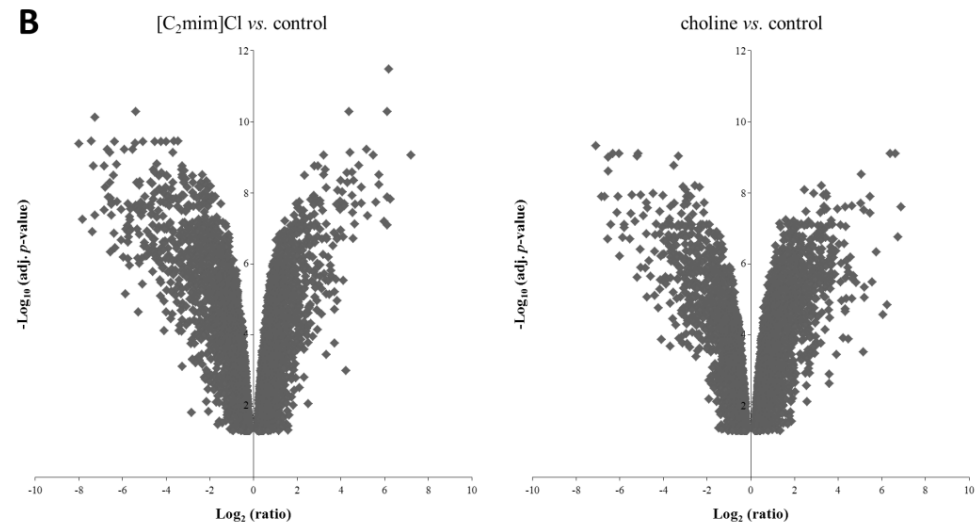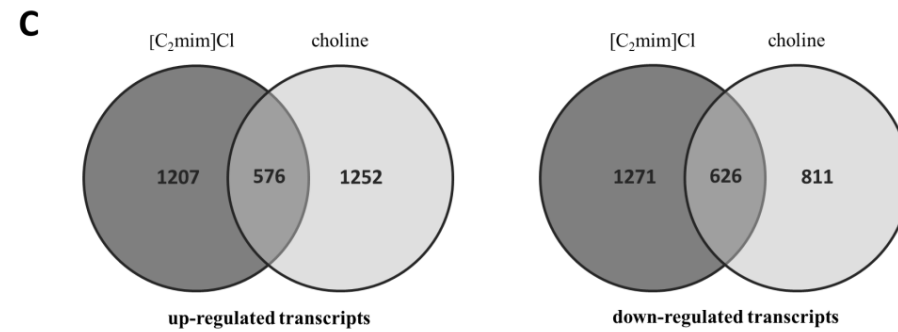

**3. List of the designed qRT-PCR oligonucleotides used in the validation of the microarray data.** Due to its constant expression in all conditions, the histone protein H3 gene (AN0733) was selected as internal control.

| <b>GeneID</b> | <b>Gene</b> | <b>Forward oligonucleotide (5' to 3')</b> | <b>Reverse oligonucleotide (5' to 3')</b> |
|---------------|-------------|-------------------------------------------|-------------------------------------------|
| AN1052        | <i>veA</i>  | TCAGAGCTCCCATCGACCA                       | GCCGGTCATCATGACCGAA                       |
| AN0363        | <i>velB</i> | CCCAAGCCCAGTACTACCAA                      | CGGTATGCACTGGCACTCA                       |
| AN0807        | <i>laeA</i> | ATGGGTTGCGGTAGTGTCA                       | CAATGCCGTTCCATCTAGTGA                     |
| AN4562        | <i>rsmA</i> | CCTCCGCGCTACAACACA                        | AGTCCGTAGGAGAGTAGACCA                     |
| AN4819        | <i>fluG</i> | AGAACCGTGAGGCGCCTA                        | GTATATCCCGCAGCCAGGAA                      |
| AN8042        | <i>hdaA</i> | CATCCAGGGAAGGACTTAGTGA                    | TTGGGAGCGGCCTTGGTA                        |
| AN8383        | <i>ausA</i> | TACAACCCTCCACCCAGCA                       | TCGGGCCCTGTAGTTGCA                        |
| AN1905        | <i>hepA</i> | GGCGAAGATAAAGGAAAGCGTA                    | CTTCTTGCCGTTATTCCAGTGA                    |
| AN3621        | <i>gcnE</i> | AATGGATCTGTGACGATGGA                      | GTTTCGCGCTCTTGGCGTA                       |
| AN2547        | <i>easB</i> | ATCGCCTCCGACGACGAA                        | GTGTTGCCGCTGATAGGAGA                      |
| AN0150        | <i>mdpG</i> | CGTCAAGATGATTCAGACCGAA                    | GCCGTGAAGAACCTATTAAGCA                    |
| AN7909        | <i>orsA</i> | CACCATTTTCCTGCGCACA                       | GAGGATGATAAGGGCCTGGA                      |
| AN0607        | <i>sidC</i> | CATTCAGAGATCCCTCGCAGA                     | AAGTGCTGTCCTGCATCCAA                      |
| AN0733        | <i>H3</i>   | TGAGATCCGTCGCTACCAGA                      | AACGGACTCCTGGAGAGCA                       |

**4. Functional Categories altered in *Aspergillus nidulans* after exposure to choline and 1-ethyl-3-methylimidazolium chloride ([C<sub>2</sub>mim]Cl).**

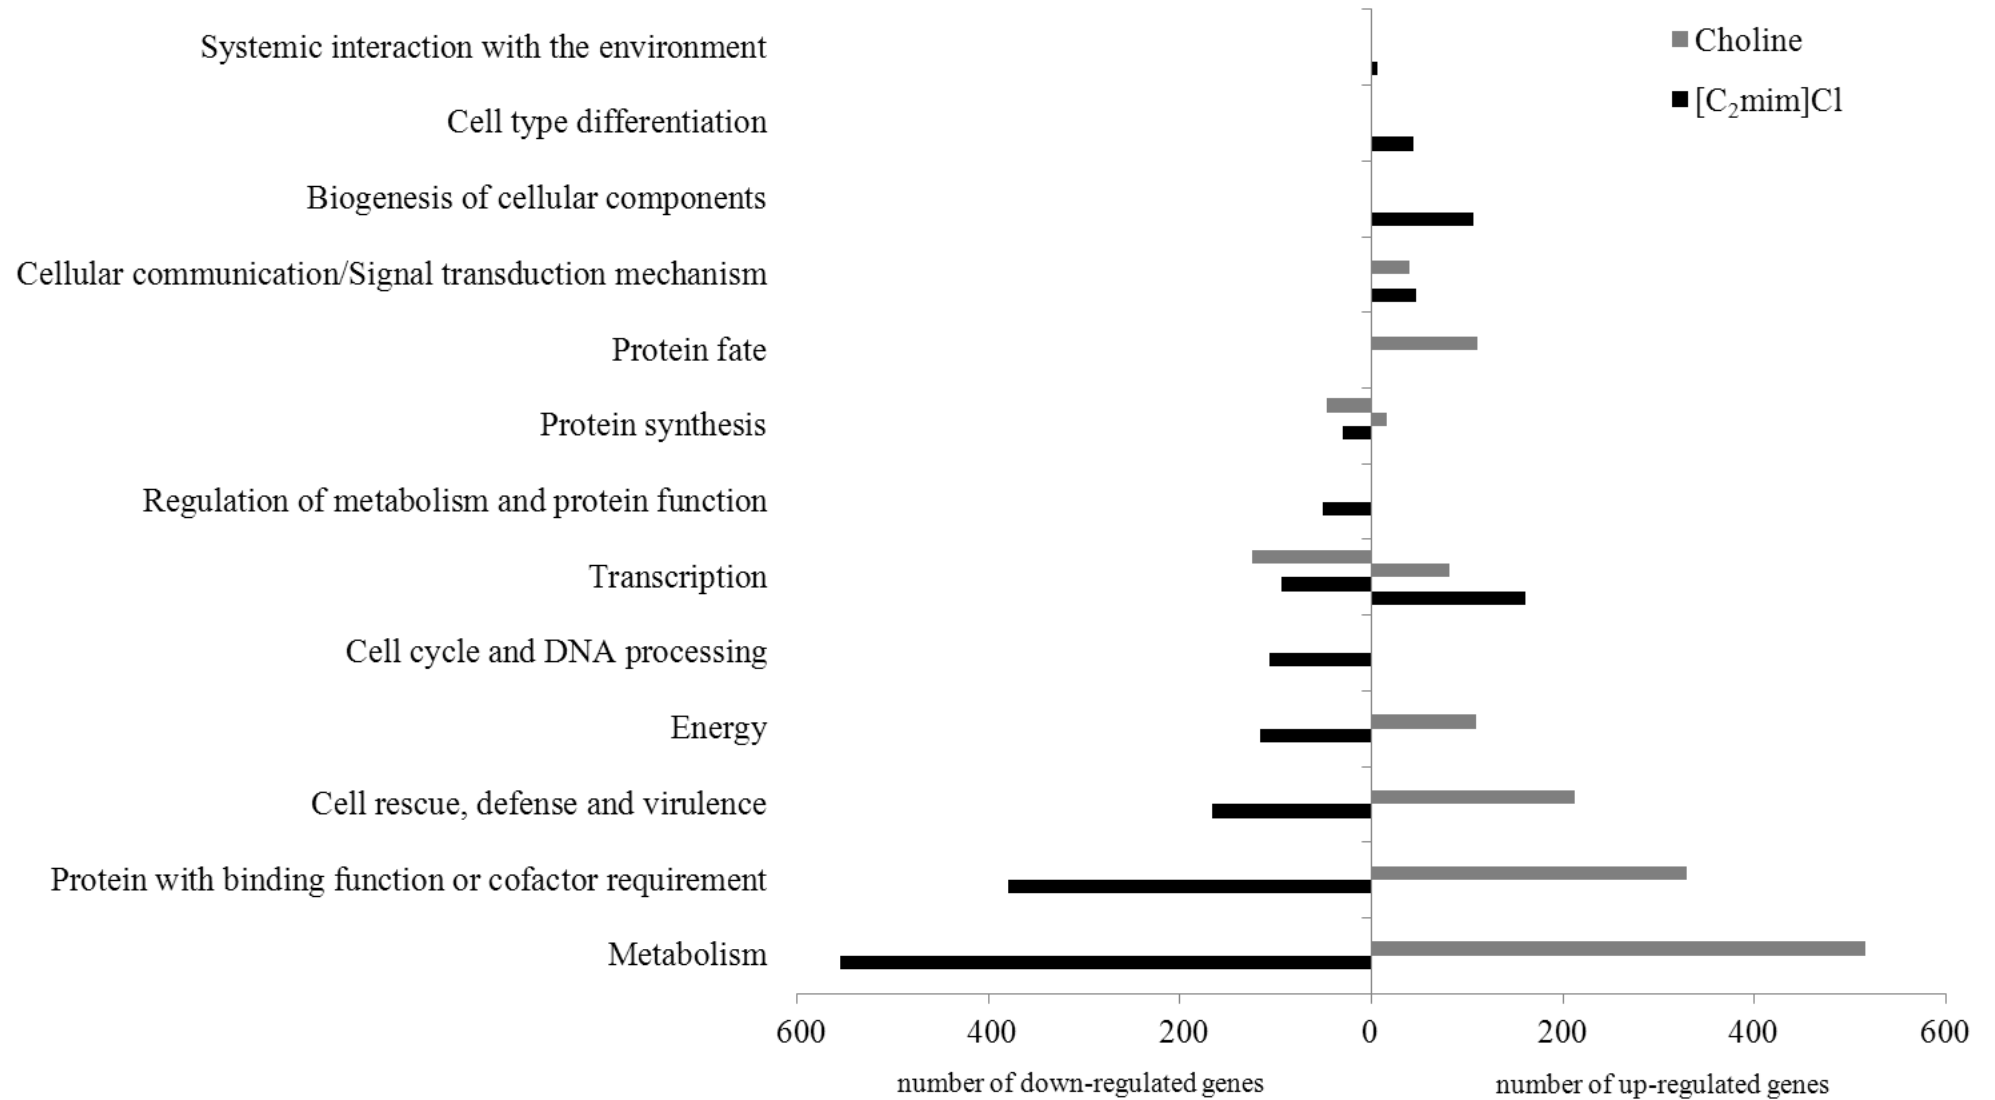

**5. Genes of primary metabolism differentially expressed after ionic liquid stimuli.** Microarray analyses (fold-change, FC) in choline or 1-ethyl-3-methylimidazolium chloride ([C<sub>2</sub>mim]Cl) supplemented media in pair-wise comparisons with the control. Values highlighted in bold are statistically significant ( $|FC| \geq 1.5$  and  $p\text{-value} \leq 0.05$ ).

| GeneID                                | Gene        | Transcriptional profile* |                        | Description                              |
|---------------------------------------|-------------|--------------------------|------------------------|------------------------------------------|
|                                       |             | Choline                  | [C <sub>2</sub> mim]Cl |                                          |
| <b>CARBOHYDRATE METABOLISM</b>        |             |                          |                        |                                          |
| <i>Glycolysis and gluconeogenesis</i> |             |                          |                        |                                          |
| AN2867                                | <i>pgmB</i> | <b>-1.82</b>             | 1.19                   | phosphoglucomutase                       |
| AN4591                                |             | <b>1.95</b>              | <b>-1.61</b>           | phosphoglucomutase                       |
| AN6037                                | <i>swoM</i> | <b>-1.70</b>             | <b>1.53</b>            | glucose 6-phosphate isomerase            |
| AN1888                                |             | -1.03                    | <b>-1.70</b>           | fructose-bisphosphate aldolase           |
| AN2334                                |             | <b>3.39</b>              | <b>1.81</b>            | fructose-bisphosphate aldolase           |
| AN6900                                | <i>tpiA</i> | <b>-1.78</b>             | 1.14                   | triosephosphate isomerase                |
| AN5908                                | <i>tpiB</i> | <b>1.73</b>              | <b>-2.08</b>           | triosephosphate isomerase                |
| AN2583                                | <i>gpdC</i> | <b>3.32</b>              | <b>7.66</b>            | glyceraldehyde-3-phosphate dehydrogenase |
| AN1873                                |             | 1.57                     | <b>1.81</b>            | phosphoglycerate mutase                  |
| AN4983                                |             | -1.23                    | <b>2.15</b>            | phosphoglycerate mutase                  |
| AN8720                                |             | 1.06                     | <b>2.35</b>            | phosphoglycerate mutase                  |
| AN5746                                | <i>acuN</i> | 1.43                     | <b>-1.56</b>           | enolase                                  |
| AN5210                                | <i>pkiA</i> | -1.39                    | <b>-1.68</b>           | pyruvate kinase                          |
| AN5843                                | <i>pdkA</i> | <b>-5.51</b>             | <b>-10.15</b>          | phosphoenolpyruvate synthase             |
| <i>Pyruvate metabolism</i>            |             |                          |                        |                                          |
| AN8396                                | <i>pdcb</i> | <b>2.68</b>              | <b>-2.65</b>           | pyruvate decarboxylase                   |
| AN0554                                | <i>aldA</i> | <b>1.53</b>              | <b>-2.21</b>           | aldehyde dehydrogenase                   |
| AN5626                                | <i>facA</i> | <b>1.55</b>              | <b>-3.26</b>           | acetyl-CoA synthetase                    |
| <i>TCA cycle and glyoxylate shunt</i> |             |                          |                        |                                          |
| AN2435                                | <i>aclA</i> | 1.35                     | <b>2.16</b>            | ATP citrate synthase                     |
| AN2436                                | <i>aclB</i> | 1.19                     | <b>1.81</b>            | ATP citrate synthase                     |
| AN10973                               |             | <b>-9.47</b>             | <b>-8.30</b>           | citrate synthase                         |
| AN5300                                |             | -1.29                    | <b>-1.67</b>           | aconitate hydratase                      |
| AN3894                                |             | <b>2.17</b>              | 1.35                   | aconitate hydratase                      |
| AN7000                                |             | <b>1.73</b>              | 1.11                   | succinate-CoA ligase                     |
| AN0896                                |             | <b>1.97</b>              | <b>-1.93</b>           | succinate dehydrogenase                  |
| AN2332                                |             | <b>1.68</b>              | 1.13                   | succinate dehydrogenase                  |
| AN2916                                |             | <b>1.86</b>              | <b>-2.41</b>           | succinate dehydrogenase                  |
| AN8707                                |             | <b>1.71</b>              | <b>-3.89</b>           | fumarate hydratase                       |
| AN5634                                | <i>acuD</i> | <b>2.49</b>              | -1.42                  | isocitrate lyase                         |
| AN6653                                | <i>acuE</i> | <b>2.30</b>              | -1.00                  | malate synthase                          |
| AN6717                                | <i>mdhA</i> | <b>1.91</b>              | -1.44                  | malate dehydrogenase                     |
| AN6499                                | <i>mdhC</i> | 1.45                     | <b>-2.38</b>           | malate dehydrogenase                     |
| AN6168                                | <i>maeA</i> | <b>11.90</b>             | <b>-3.11</b>           | malate dehydrogenase                     |
| AN6933                                | <i>maeB</i> | <b>-2.04</b>             | <b>2.39</b>            | malate dehydrogenase                     |
| AN1918                                | <i>acuF</i> | <b>1.85</b>              | -1.11                  | phosphoenolpyruvate carboxykinase        |
| <i>Pentose phosphate pathway</i>      |             |                          |                        |                                          |
| AN2981                                | <i>gsdA</i> | <b>-1.56</b>             | 1.30                   | glucose 6-phosphate 1-dehydrogenase      |
| AN0285                                |             | 1.24                     | <b>1.82</b>            | 6-phosphogluconolactonase                |
| AN3954                                |             | <b>-1.54</b>             | 1.19                   | 6-phosphogluconate dehydrogenase         |
| AN6135                                |             | <b>2.57</b>              | <b>1.61</b>            | 6-phosphogluconate dehydrogenase         |
| AN10233                               |             | <b>-4.89</b>             | <b>4.99</b>            | 6-phosphogluconate dehydrogenase         |
| AN10783                               |             | 1.30                     | <b>-2.69</b>           | 6-phosphogluconate dehydrogenase         |
| AN5907                                |             | <b>2.31</b>              | -1.23                  | ribose 5-phosphate isomerase             |
| AN7588                                |             | -1.02                    | <b>2.01</b>            | ribulose-phosphate 3-epimerase           |
| AN4913                                | <i>phk</i>  | <b>-2.63</b>             | <b>3.45</b>            | phosphoketolase                          |
| AN0240                                | <i>pppA</i> | <b>-1.53</b>             | 1.30                   | transaldolase                            |

| GeneID                                             | Gene         | Transcriptional profile* |                        | Description                                          |
|----------------------------------------------------|--------------|--------------------------|------------------------|------------------------------------------------------|
|                                                    |              | Choline                  | [C <sub>2</sub> mim]Cl |                                                      |
| AN1965                                             |              | <b>-1.64</b>             | 1.31                   | phosphoribosyl diphosphate synthase                  |
| AN7995                                             |              | 1.03                     | <b>-2.29</b>           | ribokinase                                           |
| AN4772                                             |              | <b>4.69</b>              | -1.19                  | deoxyribose-phosphate aldolase                       |
| <i>Others</i>                                      |              |                          |                        |                                                      |
| AN10060                                            |              | -1.14                    | <b>2.07</b>            | glycogen debranching enzyme, alpha-amylase           |
| AN10124                                            |              | 1.48                     | <b>2.34</b>            | β-glucosidase                                        |
| AN0712                                             | <i>bglB</i>  | <b>-1.55</b>             | -1.42                  | β-glucosidase                                        |
| AN2217                                             | <i>bxlC</i>  | <b>-1.74</b>             | 1.34                   | β-glucosidase                                        |
| AN2227                                             | <i>bglI</i>  | <b>-2.67</b>             | 1.22                   | β-glucosidase                                        |
| <b>AMINO ACIDS METABOLISM</b>                      |              |                          |                        |                                                      |
| <i>Glutamate, glutamine and proline metabolism</i> |              |                          |                        |                                                      |
| AN4376                                             | <i>gdhA</i>  | <b>2.15</b>              | 1.42                   | NADP-linked glutamate dehydrogenase                  |
| AN7451                                             | <i>gdhB</i>  | 1.03                     | <b>-2.25</b>           | NAD dependent glutamate dehydrogenase                |
| AN5134                                             | <i>gltA</i>  | 1.00                     | <b>-1.54</b>           | glutamate synthase                                   |
| AN5447                                             |              | <b>6.71</b>              | <b>-2.48</b>           | glutamate decarboxylase                              |
| AN7278                                             |              | <b>-9.96</b>             | <b>-17.03</b>          | glutamate decarboxylase                              |
| AN2248                                             | <i>gata</i>  | <b>1.98</b>              | <b>-2.32</b>           | gamma-amino-n-butyrate transaminase                  |
| AN1585                                             |              | 1.12                     | <b>1.87</b>            | succinate-semialdehyde dehydrogenase                 |
| AN3829                                             |              | <b>-2.58</b>             | <b>-1.58</b>           | succinate-semialdehyde dehydrogenase                 |
| AN4820                                             |              | <b>2.28</b>              | -1.48                  | succinate-semialdehyde dehydrogenase                 |
| AN7315                                             |              | <b>1.50</b>              | -1.20                  | succinate semialdehyde dehydrogenase                 |
| AN1733                                             |              | -1.13                    | <b>-2.40</b>           | delta-1-pyrroline-5-carboxylate dehydrogenase        |
| AN6022                                             |              | -1.08                    | <b>1.60</b>            | delta-1-pyrroline-5-carboxylate dehydrogenase        |
| AN7387                                             | <i>pcrA</i>  | <b>3.33</b>              | -1.26                  | pyrroline-5-carboxylate reductase                    |
| AN1731                                             | <i>prnD</i>  | <b>-4.96</b>             | <b>-2.88</b>           | proline oxidase                                      |
| AN5817                                             |              | 1.00                     | <b>1.58</b>            | glutamate 5-kinase                                   |
| AN5799                                             | <i>proA</i>  | <b>1.73</b>              | <b>2.25</b>            | glutamate semialdehyde dehydrogenase                 |
| <i>Arginine metabolism</i>                         |              |                          |                        |                                                      |
| AN1810                                             | <i>otaA</i>  | -1.12                    | <b>-1.63</b>           | ornithine aminotransferase                           |
| AN5867                                             | <i>ornD</i>  | <b>-2.08</b>             | -1.06                  | acetylglutamate synthase                             |
| AN8770                                             |              | <b>2.41</b>              | -1.33                  | acetylglutamate kinase                               |
| AN5749                                             |              | <b>-1.60</b>             | <b>-1.90</b>           | peptidase                                            |
| AN2914                                             | <i>argI</i>  | -1.47                    | <b>-1.86</b>           | argininosuccinate lyase                              |
| AN10079                                            | <i>ureB</i>  | 1.08                     | <b>-1.70</b>           | urease                                               |
| <i>Lysine metabolism</i>                           |              |                          |                        |                                                      |
| AN1990                                             | <i>lysD</i>  | <b>-1.57</b>             | 1.27                   | homocitrate synthase                                 |
| AN3894                                             |              | <b>2.17</b>              | 1.35                   | aconitate hydratase                                  |
| AN5206                                             | <i>lysB</i>  | 1.49                     | <b>-1.50</b>           | isocitrate dehydrogenase                             |
| AN5601                                             |              | 1.13                     | <b>-1.62</b>           | saccharopine dehydrogenase                           |
| <i>Histidine metabolism</i>                        |              |                          |                        |                                                      |
| AN3748                                             |              | 1.02                     | <b>-1.78</b>           | ATP phosphoribosyltransferase                        |
| AN0797                                             |              | -1.21                    | <b>-1.90</b>           | phosphoribosyl-AMP cyclohydrolase                    |
| AN0717                                             |              | -1.19                    | <b>-1.94</b>           | histidinol-phosphate aminotransferase                |
| AN7044                                             |              | 1.47                     | <b>-2.05</b>           | histidinol phosphatase                               |
| AN2723                                             |              | <b>3.54</b>              | <b>1.71</b>            | histidinol dehydrogenase                             |
| <i>Tyrosine, phenylalanine and tryptophan</i>      |              |                          |                        |                                                      |
| AN1673                                             |              | <b>2.50</b>              | <b>-2.00</b>           | phospho-2-dehydro-3-deoxyheptonate aldolase          |
| AN5701                                             | <i>aroF</i>  | <b>1.81</b>              | <b>-1.72</b>           | 3-deoxy-D-arabino-heptulosonate 7-phosphate synthase |
| AN0708                                             | <i>aromA</i> | <b>-1.56</b>             | 1.11                   | pentafunctional AROM polypeptide                     |
| AN3695                                             |              | <b>1.60</b>              | -1.35                  | anthranilate synthase                                |
| AN3634                                             |              | 1.17                     | <b>-2.89</b>           | anthranilate phosphoribosyltransferase               |
| AN6866                                             | <i>aroC</i>  | -1.48                    | <b>-1.51</b>           | chorismate mutase                                    |
| AN6338                                             |              | <b>1.69</b>              | <b>-2.78</b>           | aromatic aminotransferase                            |
| <i>Glycine, serine and threonine metabolism</i>    |              |                          |                        |                                                      |
| AN1430                                             |              | <b>2.51</b>              | <b>-1.72</b>           | betaine aldehyde dehydrogenase                       |
| AN8654                                             |              | <b>20.35</b>             | <b>-5.15</b>           | dimethylglycine oxidase                              |



| GeneID                                                 | Gene         | Transcriptional profile* |                        | Description                                  |
|--------------------------------------------------------|--------------|--------------------------|------------------------|----------------------------------------------|
|                                                        |              | Choline                  | [C <sub>2</sub> mim]Cl |                                              |
| AN1342                                                 |              | <b>4.99</b>              | -1.31                  | aminotransferase                             |
| AN10745                                                |              | <b>2.46</b>              | -1.22                  | serine hydroxymethyltransferase              |
| AN3058                                                 |              | <b>-2.31</b>             | -1.19                  | serine hydroxymethyltransferase              |
| AN1198                                                 |              | <b>5.00</b>              | <b>-2.15</b>           | glycine cleavage system T protein            |
| AN3866                                                 |              | <b>118.88</b>            | 1.23                   | L-serine dehydratase                         |
| AN7564                                                 |              | <b>-1.87</b>             | <b>-3.13</b>           | L-allothreonine aldolase                     |
| AN8843                                                 |              | -1.45                    | <b>-1.96</b>           | homoserine kinase                            |
| AN2525                                                 |              | <b>1.54</b>              | -1.34                  | pyridoxal-phosphate dependent enzyme         |
| <i>Cysteine and methionine metabolism</i>              |              |                          |                        |                                              |
| AN0875                                                 |              | -1.15                    | <b>-25.05</b>          | homoserine acetyltransferase                 |
| AN5820                                                 | <i>mecA</i>  | <b>1.97</b>              | <b>-4.91</b>           | cystathionine beta-synthase                  |
| AN3456                                                 |              | -1.30                    | <b>-1.56</b>           | cystathionine gamma-synthase                 |
| AN1446                                                 | <i>mecB</i>  | <b>2.34</b>              | <b>2.40</b>            | cystathionine gamma-lyase                    |
| AN4443                                                 | <i>metH</i>  | <b>-1.72</b>             | <b>-1.83</b>           | methionine synthase                          |
| <i>Aspartate and asparagine and alanine metabolism</i> |              |                          |                        |                                              |
| AN1993                                                 |              | <b>2.87</b>              | <b>1.66</b>            | aspartate aminotransferase                   |
| AN6048                                                 |              | <b>3.90</b>              | <b>-1.50</b>           | aspartate transaminase                       |
| AN8709                                                 |              | <b>2.32</b>              | -1.11                  | aspartate transaminase                       |
| AN0300                                                 | <i>ahtA</i>  | <b>1.94</b>              | <b>1.52</b>            | L-asparaginase                               |
| AN1891                                                 |              | -1.16                    | <b>4.04</b>            | asparaginase                                 |
| AN9195                                                 |              | 1.46                     | <b>2.01</b>            | L-asparaginase II                            |
| AN4401                                                 |              | 1.02                     | <b>1.62</b>            | asparagine synthetase                        |
| AN8754                                                 |              | <b>2.07</b>              | -1.02                  | asparagine synthase                          |
| AN1342                                                 |              | <b>4.99</b>              | -1.31                  | aminotransferase                             |
| AN5193                                                 |              | <b>1.64</b>              | 1.16                   | aspartate aminotransferase                   |
| <i>Valine, leucine and isoleucine metabolism</i>       |              |                          |                        |                                              |
| AN4058                                                 |              | -1.43                    | <b>-7.94</b>           | dihydroxy-acid dehydratase                   |
| AN5138                                                 |              | 1.38                     | <b>-1.77</b>           | dihydroxy-acid dehydratase                   |
| AN6346                                                 |              | -1.04                    | <b>-2.07</b>           | dihydroxy-acid dehydratase                   |
| AN7358                                                 |              | <b>1.92</b>              | <b>4.11</b>            | dihydroxy-acid dehydratase                   |
| AN0840                                                 |              | 1.19                     | <b>-1.51</b>           | 2-isopropylmalate synthase                   |
| AN5886                                                 | <i>luA</i>   | <b>1.59</b>              | 1.41                   | 3-isopropylmalate dehydratase                |
| AN2793                                                 | <i>leu2B</i> | <b>1.85</b>              | <b>-1.64</b>           | 3-isopropylmalate dehydrogenase              |
| AN4323                                                 |              | 1.46                     | <b>-2.13</b>           | branched-chain amino acid aminotransferase   |
| AN5957                                                 |              | <b>1.55</b>              | <b>-1.57</b>           | branched-chain amino acid aminotransferase   |
| AN7876                                                 |              | <b>2.46</b>              | -1.04                  | branched-chain amino acid aminotransferase   |
| AN7878                                                 |              | <b>-1.61</b>             | <b>-1.83</b>           | branched-chain amino acid aminotransferase   |
| AN5916                                                 | <i>echA</i>  | <b>1.56</b>              | <b>-2.91</b>           | enoyl-CoA hydratase/isomerase                |
| AN0574                                                 |              | 1.44                     | <b>-2.59</b>           | 3-oxoacyl-(acyl-carrier-protein) reductase   |
| AN10512                                                | <i>mtH</i>   | 1.43                     | <b>-2.71</b>           | acetyl-CoA-acetyltransferase                 |
| AN4688                                                 | <i>ivdA</i>  | <b>2.24</b>              | <b>-4.73</b>           | isovaleryl-coenzyme A dehydrogenase          |
| AN4687                                                 | <i>mccD</i>  | <b>1.95</b>              | <b>-3.48</b>           | 3-methylcrotonyl-CoA carboxylase             |
| AN2896                                                 |              | 1.46                     | <b>-1.89</b>           | mitochondrial methylglutaconyl-CoA hydratase |
| AN5273                                                 | <i>hlyA</i>  | -1.15                    | <b>1.86</b>            | hydroxymethylglutaryl-CoA lyase              |
| AN9131                                                 |              | <b>-1.68</b>             | -1.19                  | hydroxymethylglutaryl-CoA lyase              |
| AN10797                                                |              | 1.39                     | <b>-2.42</b>           | hydroxymethylglutaryl-CoA lyase              |
| AN5669                                                 |              | <b>2.50</b>              | <b>-2.81</b>           | succinyl-CoA:3-ketoacid-CoA transferase      |
| AN8559                                                 |              | <b>1.83</b>              | <b>-3.23</b>           | 2-oxoisovalerate dehydrogenase               |
| AN0593                                                 |              | <b>-2.61</b>             | <b>2.01</b>            | 3-hydroxyisobutyrate dehydrogenase           |
| AN3591                                                 |              | <b>3.36</b>              | <b>-3.37</b>           | methylmalonate-semialdehyde dehydrogenase    |
| AN10656                                                |              | -1.19                    | <b>2.77</b>            | propionyl-CoA carboxylase                    |
| <i>Other</i>                                           |              |                          |                        |                                              |
| AN8899                                                 |              | <b>9.30</b>              | <b>1.67</b>            | 1-aminocyclopropane-1-carboxylate deaminase  |

\* values highlighted in bold have  $|FC| \geq 1.5$  and  $p$ -value  $\leq 0.05$  in the microarray data.
